# Supplementary material
Source: PubMed Central journal article supplement (PMC6832811)
Supplement: NIHMS1535429-supplement-1.pdf [file NIHMS1535429-supplement-1.pdf]

**Supplemental Figure 1: Uveitis Survey**

### Patient Demographic Information

Age at onset of treatment (years)

Gender  
  reset

Race/Ethnicity  
   
   
  reset

### Uveitis Clinical Summary

Type of Uveitis  
   
   
  reset

ICD-10 / ICD-9 Diagnosis Code (if available)

Date of Uveitis Diagnosis  
  M-D-Y

Date of Uveitis Resolution  
  M-D-Y

Uveitis clinical summary using Standardization of Uveitis (SUN) Nomenclature

|                        | 0.5+                  | 1+                    | 2+                    | 3+                    | 4+                    | N/A                   |
|------------------------|-----------------------|-----------------------|-----------------------|-----------------------|-----------------------|-----------------------|
| Anterior chamber cell  | <input type="radio"/> |
| Anterior chamber flare | <input type="radio"/> |
| Vitreous cell          | <input type="radio"/> |
| Vitreous haze          | <input type="radio"/> |

Complications (select all that apply)

### Uveitis Treatment

Uveitis treatment that patient received  
 Expand

Patient response to treatment  
 Expand

Clinical outcome and duration of followup  
 Expand

Did patient have a previous history of uveitis prior to starting the drug of interest?  
  reset

### Checkpoint Inhibitor Drug Information

Which of the following drugs of interest was the patient administered? (select multiple if patient on combination therapy)

What was the drug dose and dosing regimen, if available?

Dates of Drug Treatment

Date of first drug infusion  
  M-D-Y

Date of last drug infusion  
  M-D-Y

What was the clinical indication for the drug of interest (concurrent cancer diagnosis)?

reset

## Supplemental Figure 1: Uveitis Survey

The online survey was designed and distributed through the secure electronic data collection tool REDCap. The survey consisted of 18 primary questions, with additional secondary questions requesting additional information displayed if specific responses were inputted. Deidentified patient data was collected, including questions regarding patient demographic information, uveitis clinical summary, uveitis treatment, and checkpoint inhibitor drug information. All responses were saved in HIPAA compliant data backup.
